# Supplementary material
Source: PubMed Central journal article supplement (PMC5663439)
Supplement: NIHMS910351-supplement-Supplementary_Table_1.pdf [file NIHMS910351-supplement-Supplementary_Table_1.pdf]

Supplemental Table 1. Clinical characteristics of pancreatic cancer patients studied.

| Case Number | Age/Sex | Diagnosis*    | Treatment | Survival† | Metastatic Burden‡ | Organ Sites Affected | Use in Study       |
|-------------|---------|---------------|-----------|-----------|--------------------|----------------------|--------------------|
| Pam01       | 59M     | Stage IV PDAC | No        | 7 mo      | 5                  | Liver, Lymph Node    | WGS/Discovery Set  |
| Pam02       | 69F     | Stage IV PDAC | No        | 0.5 mo    | >100               | Liver                | WGS/Discovery Set  |
| Pam03       | 79M     | Stage IV PDAC | No        | 10 mo     | 50                 | Liver, Lung          | WGS/Discovery Set  |
| Pam04       | 74M     | Stage IV PDAC | No        | 3 mo      | >100               | Peritoneum           | WGS/Discovery Set  |
| Pam13       | 85F     | Stage IV PDAC | No        | 2 mo      | >100               | Liver                | WES/Validation Set |
| Pam16       | 88F     | Stage IV PDAC | No        | <1 mo     | >100               | Liver, Lymph Node    | WES/Validation Set |

\*PDAC: pancreatic ductal adenocarcinoma

† from diagnosis to death

‡ total number of metastases at autopsy based on gross and histologic assessment
