# Supplementary material
Source: PubMed Central journal article supplement (PMC5663439)
Supplement: NIHMS910351-supplement-Supplementary_Table_2.pdf [file NIHMS910351-supplement-Supplementary_Table_2.pdf]

**Supplemental Table 2. Samples used for Whole genome (WGS) and directed sequencing or Whole exome sequencing (WES).**

|       | <b>Tissue type</b>               | <b># of samples</b> | <b># used for WGS/WES</b> | <b># used for Targeted Sequencing</b> |
|-------|----------------------------------|---------------------|---------------------------|---------------------------------------|
| Pam01 | Normal tissues                   | 1                   | 1                         | 1                                     |
|       | Distinct parts of primary tumors | 2                   | 0                         | 2                                     |
|       | Metastases                       | 4                   | 4                         | 4                                     |
| Pam02 | Normal tissues                   | 1                   | 1                         | 1                                     |
|       | Distinct parts of primary tumor  | 18                  | 3                         | 18                                    |
|       | Metastases                       | 8                   | 8                         | 8                                     |
| Pam03 | Normal tissues                   | 1                   | 1                         | 1                                     |
|       | Distinct parts of primary tumor  | 12                  | 3                         | 12                                    |
|       | Metastases                       | 12                  | 8                         | 12                                    |
| Pam04 | Normal tissues                   | 1                   | 1                         | 1                                     |
|       | Distinct parts of primary tumor  | 27                  | 3                         | 27                                    |
|       | Metastases                       | 6                   | 6                         | 6                                     |
| Pam13 | Normal tissues                   | 1                   | 1                         | -                                     |
|       | Distinct parts of primary tumor  | 1                   | 1                         | -                                     |
|       | Metastases                       | 3                   | 3                         | -                                     |
| Pam16 | Normal tissues                   | 1                   | 1                         | -                                     |
|       | Distinct parts of primary tumor  | 2                   | 2                         | -                                     |
|       | Metastases                       | 2                   | 2                         | -                                     |
